# Supplementary material for: High-sensitivity hybrid MoSe2/AgInGaS quantum dot heterojunction photodetector
Source: Royal Society of Chemistry journal article supplement (doi:10.1039/d3ra07240a), 2024-01-01
Supplement: d3ra07240a1.pdf [file d3ra07240a1.pdf]

## Supporting Information

### High-sensitivity hybrid MoSe<sub>2</sub>/AgInGaS quantum dots heterojunction photodetector

Xunjia Zhao<sup>#1</sup>, Xusheng Wang<sup>#1</sup>, Runmeng Jia<sup>1</sup>, Yuhai Lin<sup>1</sup>, TingTing Guo<sup>1</sup>, Linxiang Wu<sup>1</sup>, Xudong Hu<sup>1</sup>, Tong Zhao<sup>1</sup>, Danni Yan<sup>1</sup>, Lin zhu<sup>2</sup>, Zhanyang Chen<sup>2</sup>, Xinsen Xu<sup>2</sup>, Xiang Chen<sup>\*1</sup>, Xiufeng Song<sup>\*1</sup>

1 MIIT Key Laboratory of Advanced Display Materials and Devices, School of Materials Science and Engineering, Nanjing University of Science and Technology, Nanjing 210094, China

2 Shangdong Gemei Tungsten & Molybdenum Material Co.LTD, Weihai 265222, China

# These authors contributed equally to this work.

\*Corresponding Author

E-mail: xiangchen@njjust.edu.cn, xiufengsoong@njjust.edu.cn

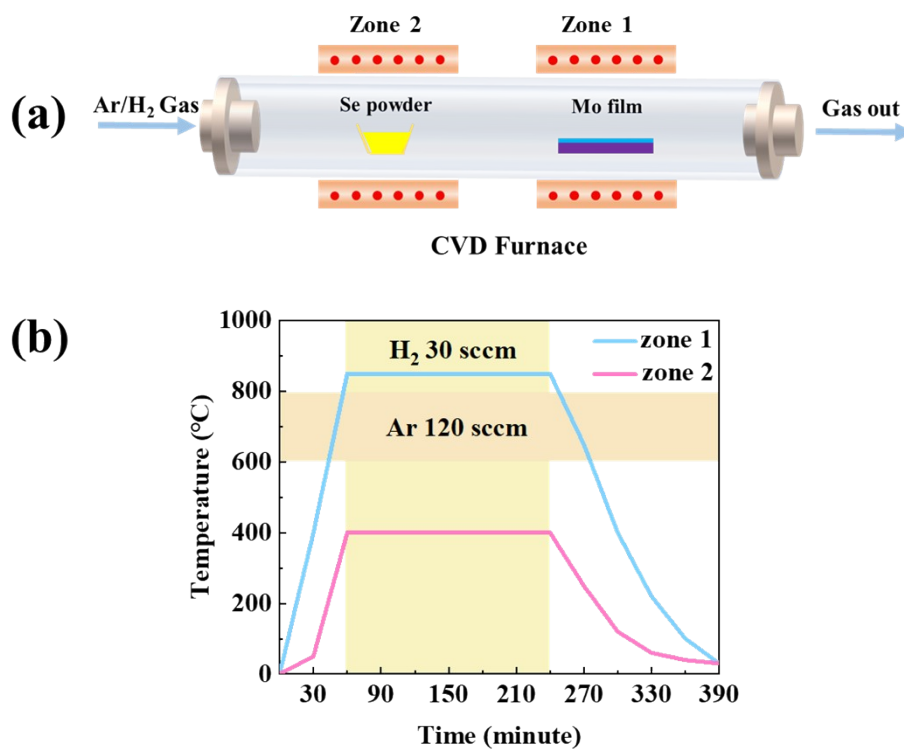

Fig.S1 (a) Schematic diagram of the quartz tube and the precursor positions. (b) The change process of reaction temperature of Zone 1 and Zone 2.

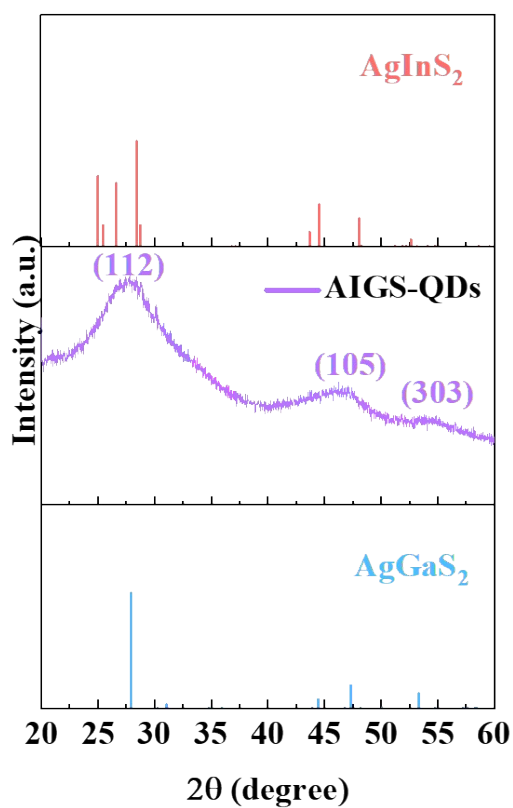

Fig.S2 XRD pattern of the AIGS-QDs. XRD patterns of AgInS<sub>2</sub> (PDF# 25-1328) and AgGaS<sub>2</sub> (PDF# 73-1233) are included as references.

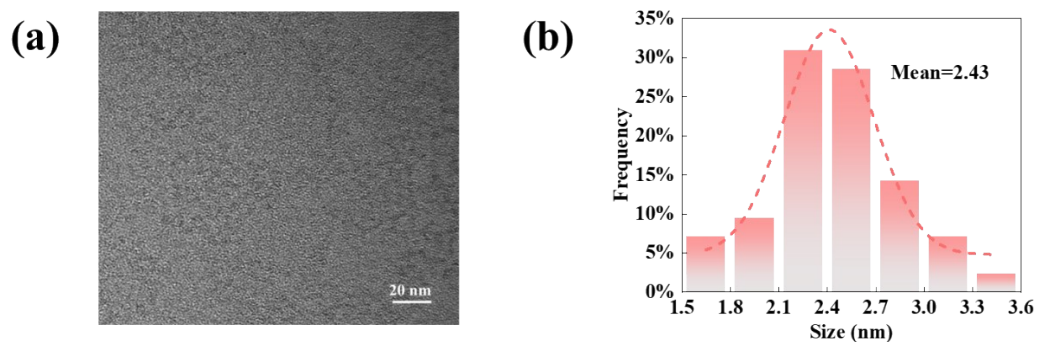

Fig.S3 (a) TEM image of the AIGS-QDs. Scale bar is 20 nm. (b) Histograms of the AIGS-QDs size distribution.

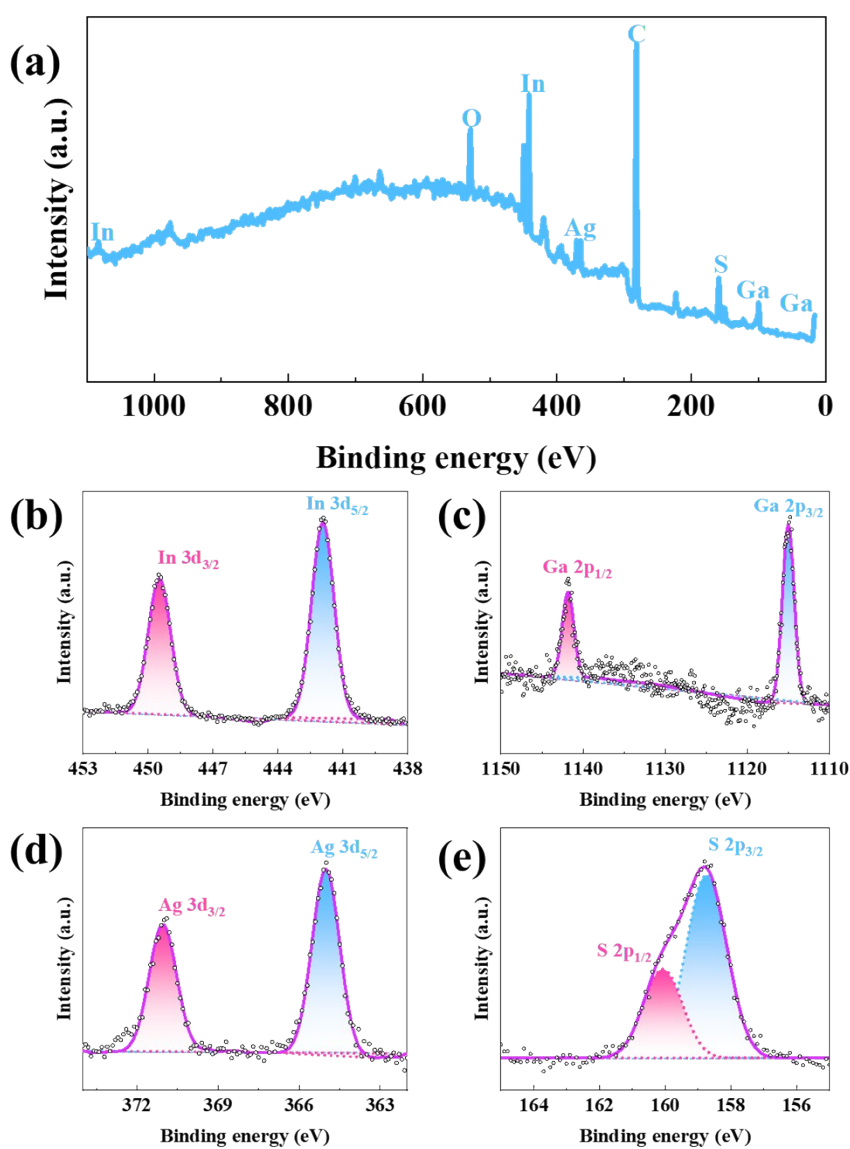

Fig.S4 XPS spectra of AIGS-QDs. (a) Survey spectrum. (b) In 3d<sub>3/2</sub> and 3d<sub>5/2</sub> peaks. (c) Ga 2p<sub>1/2</sub> and Ga 2p<sub>3/2</sub> peaks. (d) Ag 3d<sub>3/2</sub> and 3d<sub>5/2</sub> peaks. (e) S 2p<sub>1/2</sub> and S 2p<sub>3/2</sub> peaks.

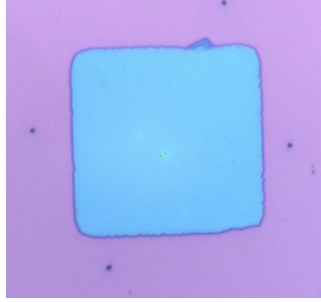

Fig.S5 Optical microscope (OM) photograph of a square ( $50\ \mu\text{m} \times 50\ \mu\text{m}$ ) MoSe<sub>2</sub> film.

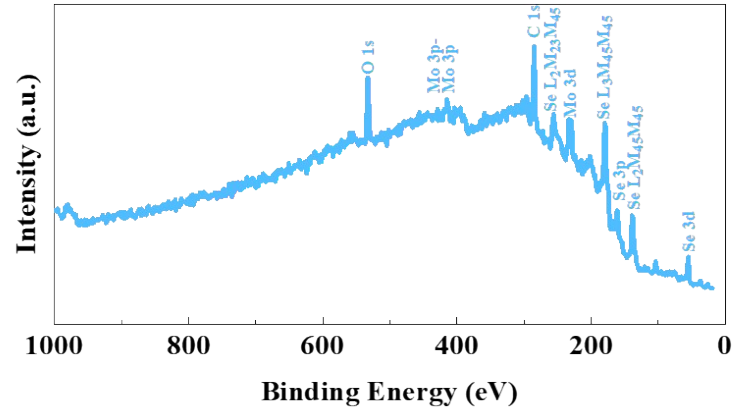

Fig.S6 XPS spectrum of MoSe<sub>2</sub>.

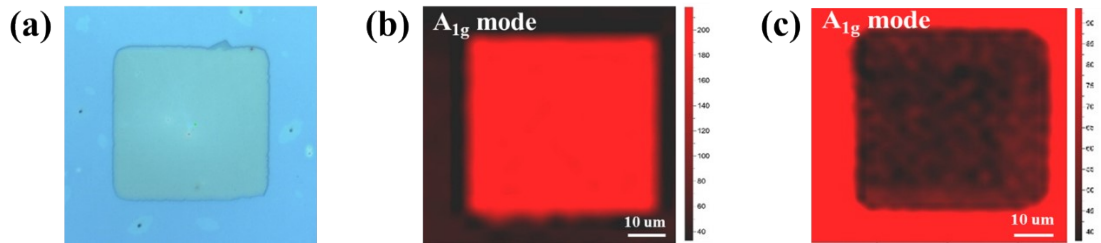

Fig.S7 (a) Optical microscope (OM) photograph of MoSe<sub>2</sub> film with AIGS-QDs. (b) A<sub>1g</sub> mode Raman mapping. (c) A<sub>1g</sub> mode Raman mapping.

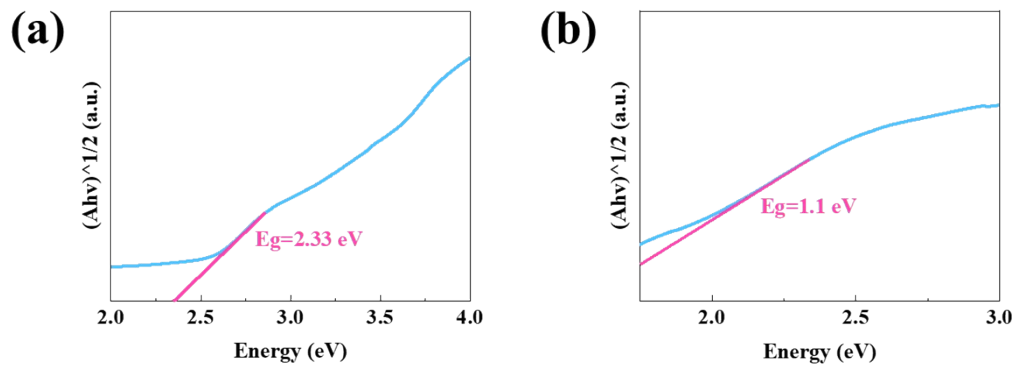

Fig.S8 Bandgap of AIGS-QDs and MoSe<sub>2</sub> are determined using Tauc plots.

The TRPL decay curves in Fig.2c were fitted using a biexponential decay equation to determine the lifetime of both AIGS-QDs and the MoSe<sub>2</sub>/AIGS-QDs heterostructure.

The biexponential decay equation is given by:

$$Y(x) = y_0 + A_1 * \exp\left(\frac{-x}{\tau_1}\right) + A_2 * \exp\left(\frac{-x}{\tau_2}\right).$$

The average lifetime ( $\tau$ ) is calculated from the fitting parameters as an intensity

$$\text{weighted average, given by } \tau = \frac{\sum A_i \tau_i^2}{\sum A_i \tau_i} (i=1,2).$$

**Table S1. PL lifetimes of AIGS-QDs and MoSe<sub>2</sub>/AIGS-QDs heterojunction.**

|                             | $y_0$   | $A_1$   | $\tau_1$ (ns) | $A_2$   | $\tau_2$ (ns) | R     | $\tau$ (ns) |
|-----------------------------|---------|---------|---------------|---------|---------------|-------|-------------|
| AIGS-QDs                    | 1272.79 | 1872.51 | 1.28          | 1959.74 | 16.91         | 0.993 | 15.84       |
| MoSe <sub>2</sub> /AIGS-QDs | 723.47  | 3500.11 | 1.54          | 1046.89 | 6.71          | 0.995 | 4.46        |
